# Supplementary material for: Ring Vibrations to Sense Anionic Ibuprofen in Aqueous Solution as Revealed by Resonance Raman
Source: MDPI journal article supplement (doi:10.3390/molecules27020442), 2022-01-10
Supplement: s1 [file s1]

# Ring vibrations to sense anionic Ibuprofen in aqueous solution as revealed by Resonance Raman

Sara Gómez,<sup>†</sup> Natalia Rojas-Valencia,<sup>‡</sup> Tommaso Giovannini,<sup>†</sup>  
Albeiro Restrepo,<sup>‡</sup> Chiara Cappelli,<sup>†</sup>

<sup>†</sup>*Scuola Normale Superiore, Classe di Scienze, Piazza dei Cavalieri 7, 56126, Pisa, Italy*

<sup>‡</sup>*Instituto de Química, Universidad de Antioquia UdeA, Calle 70 No. 52-21, Medellín, Colombia*

## Supplementary Material

### Contents

- 1 Clustering Methodology
- 2 Additional plots regarding UV-Vis
- 3 Additional plots regarding RR
- 4 Convergence plots

# 1 Clustering Methodology

Ibu1 (47%)

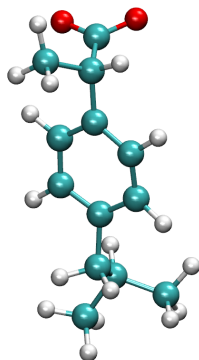

Ibu2 (34%)

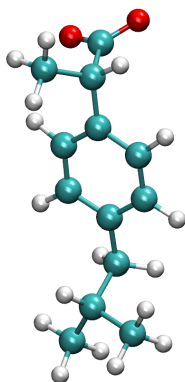

Ibu3 (10%)

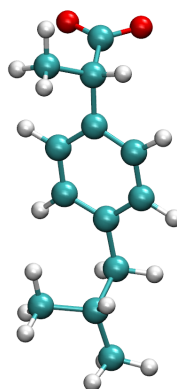

Ibu4 (8%)

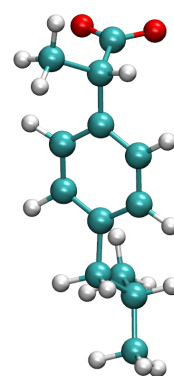

Ibu5 (1%)

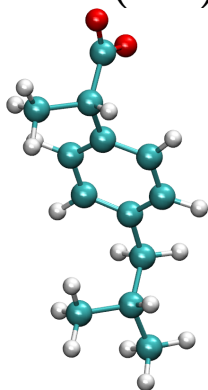

Ibu6 ( $\approx 0\%$ )

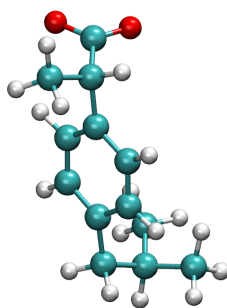

Ibu7 ( $\approx 0\%$ )

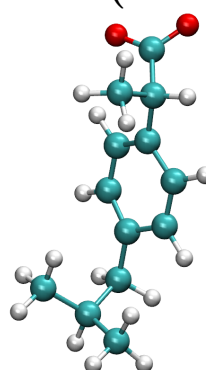

Figure S1: The 7 most populated conformers obtained from a 30 ns MD simulation of a anionic Ibuprofen in aqueous solution at 298 K; clustering performed with a 0.13 nm cut-off with the GROMOS method.

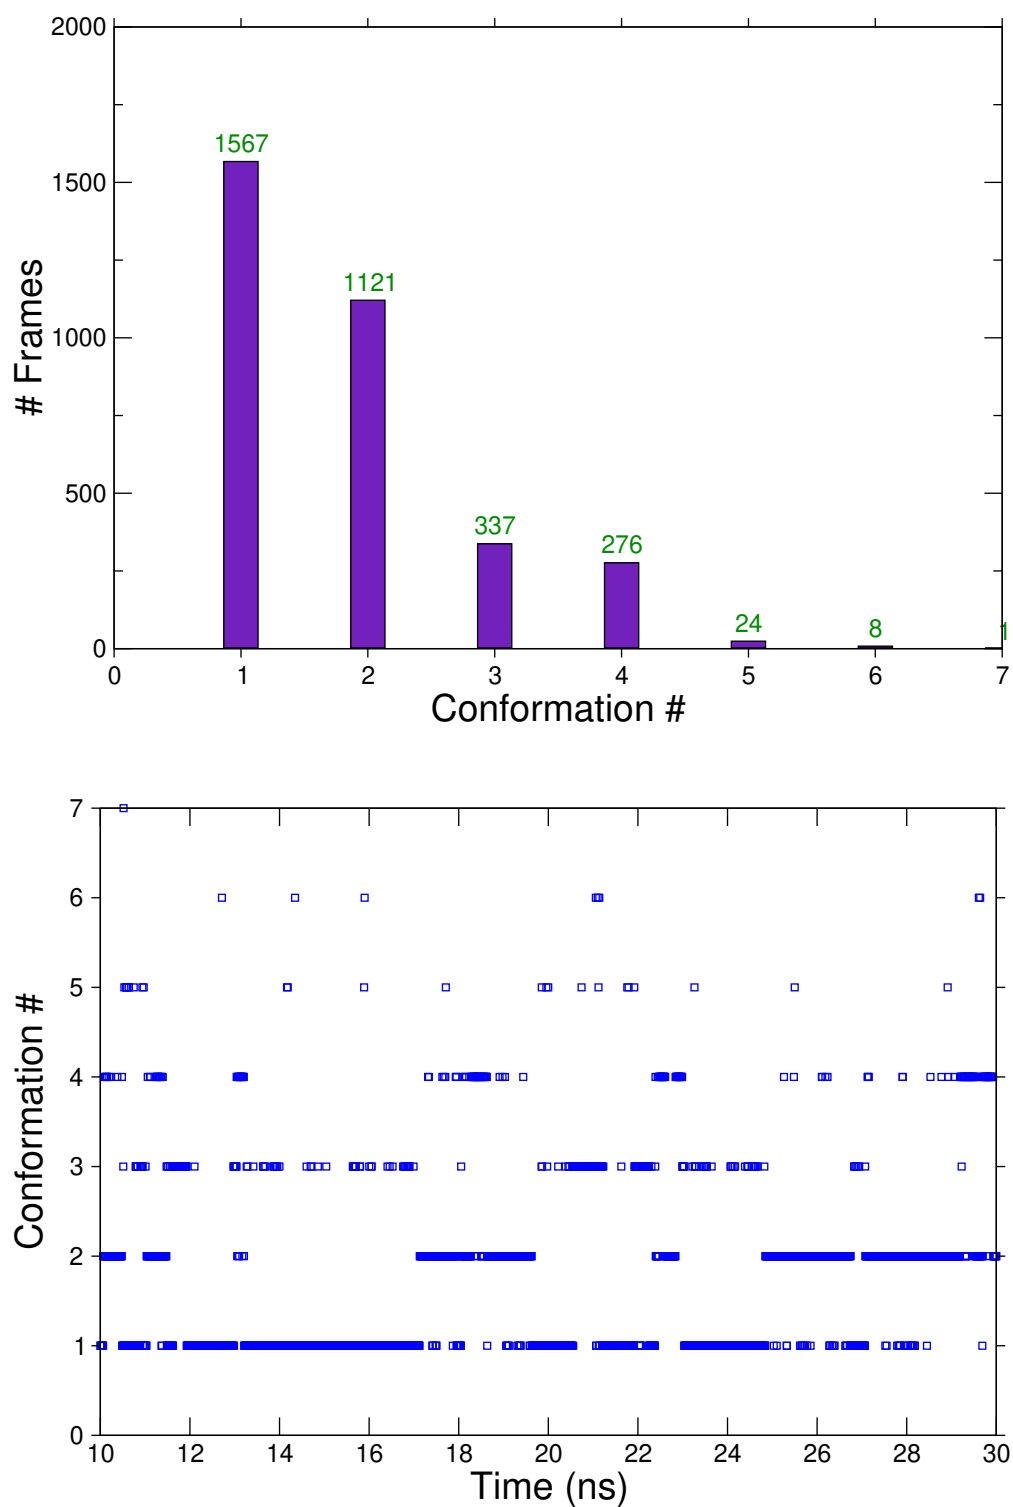

Figure S2: Top panel: Number of frames exhibiting a similar conformation of Ibu<sup>-</sup>. Bottom panel: the occurrence along the MD simulation of the seven most populated structures. The corresponding conformations are displayed in Figure S1.

## 2 Additional plots regarding UV-Vis

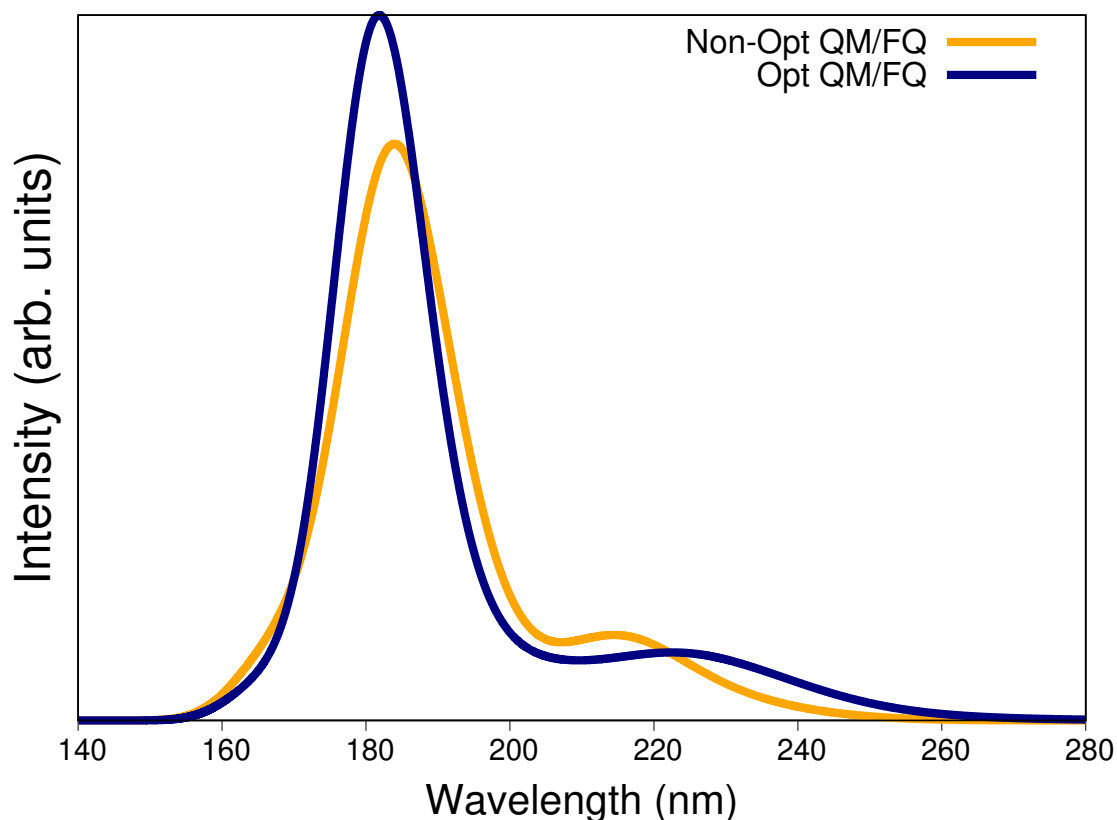

Figure S3: Effect of the optimization on the final UV-Vis spectra of anionic Ibuprofen in water. 200 structures were optimized at the QM/FQ level, with B3LYP/6-311++G(*d,p*) and then the absorption spectra were calculated in the TD-DFT framework.

### 3 Additional plots regarding RR

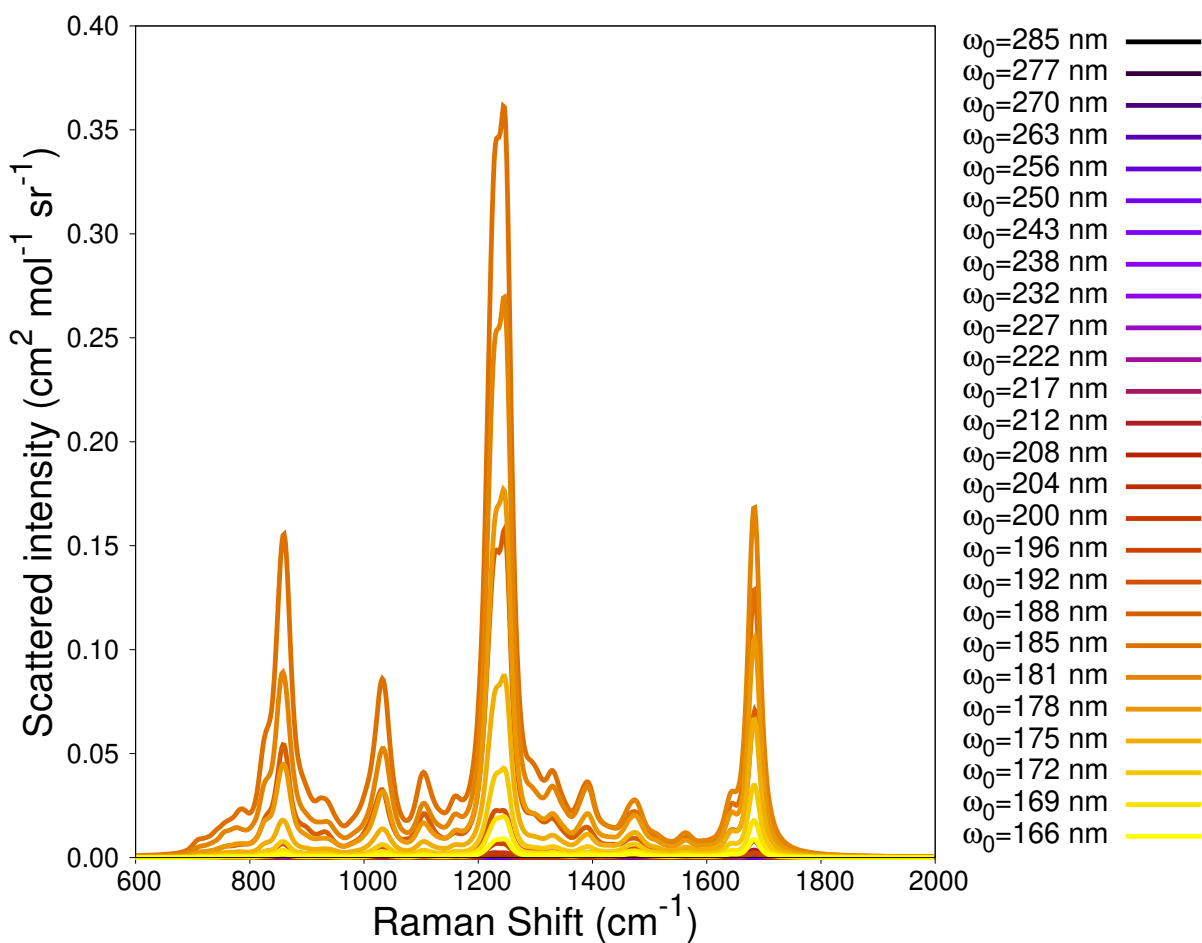

Figure S4: Resonance Raman spectra of anionic Ibuprofen in water, computed at different incident wavelengths.

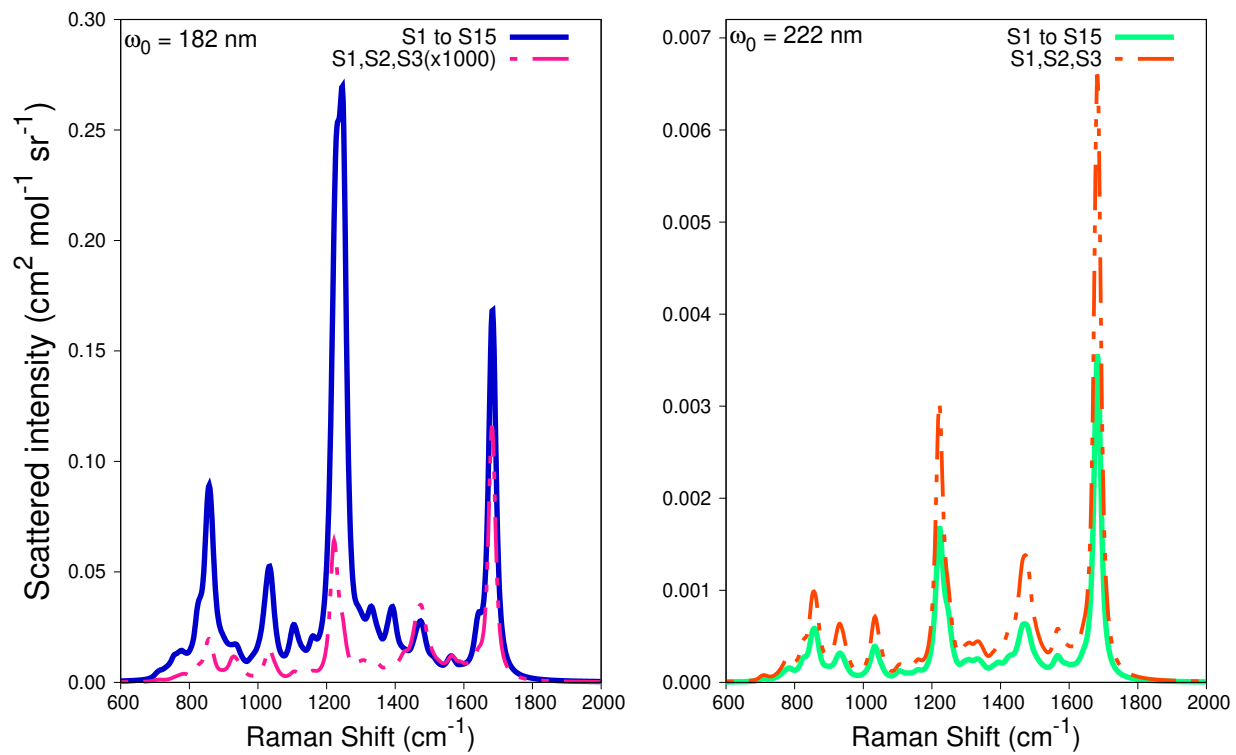

Figure S5: Effect of specific excited states on the selectivity and intensity seen in Resonance Raman spectra of anionic Ibuprofen in aqueous solution.

## 4 Convergence plots

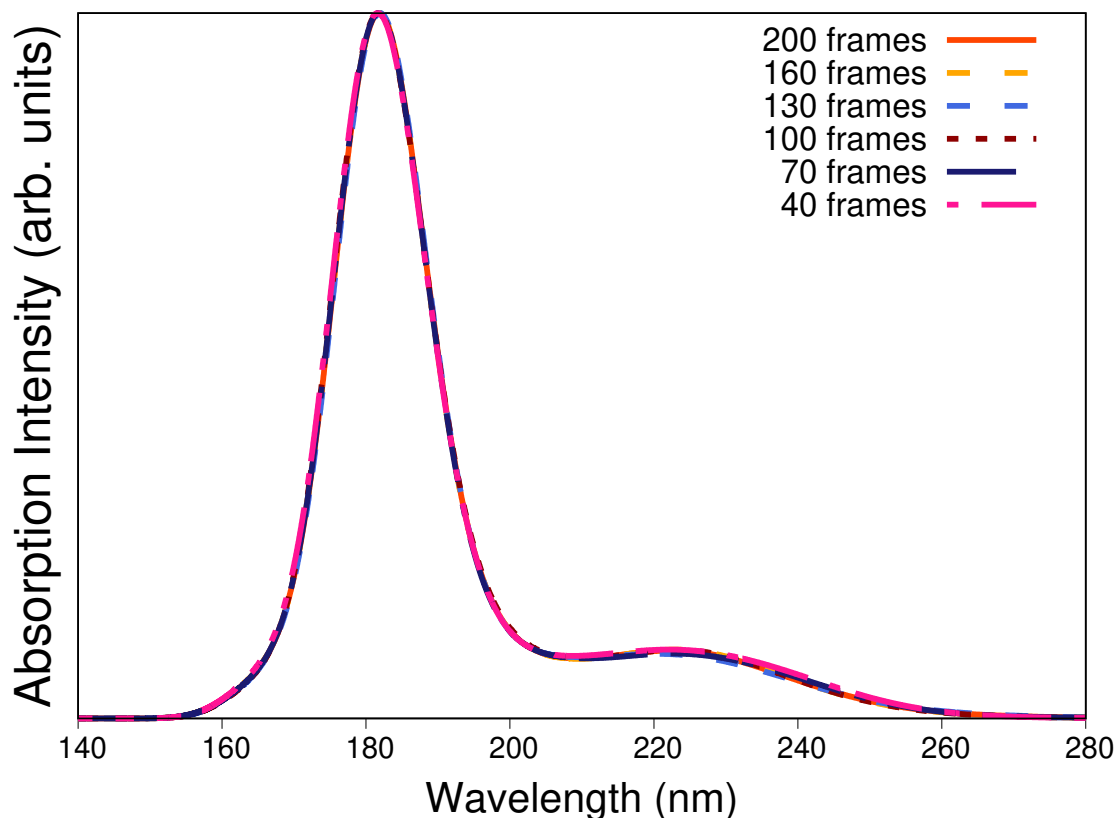

Figure S6: Comparison between the QM/FQ absorption spectra of anionic Ibuprofen in aqueous solution obtained by averaging an increasing number of snapshots.

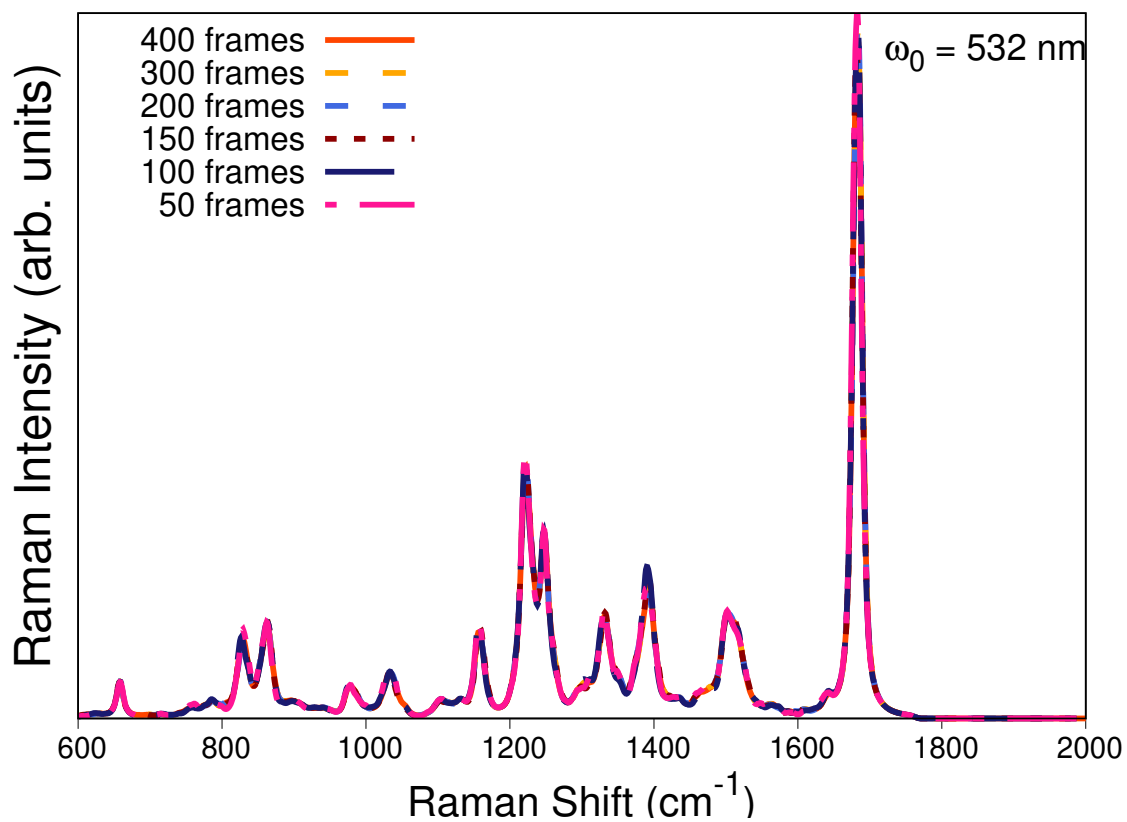

Figure S7: Comparison between the QM/FQ Raman spectra of anionic Ibuprofen in aqueous solution obtained by averaging an increasing number of snapshots.

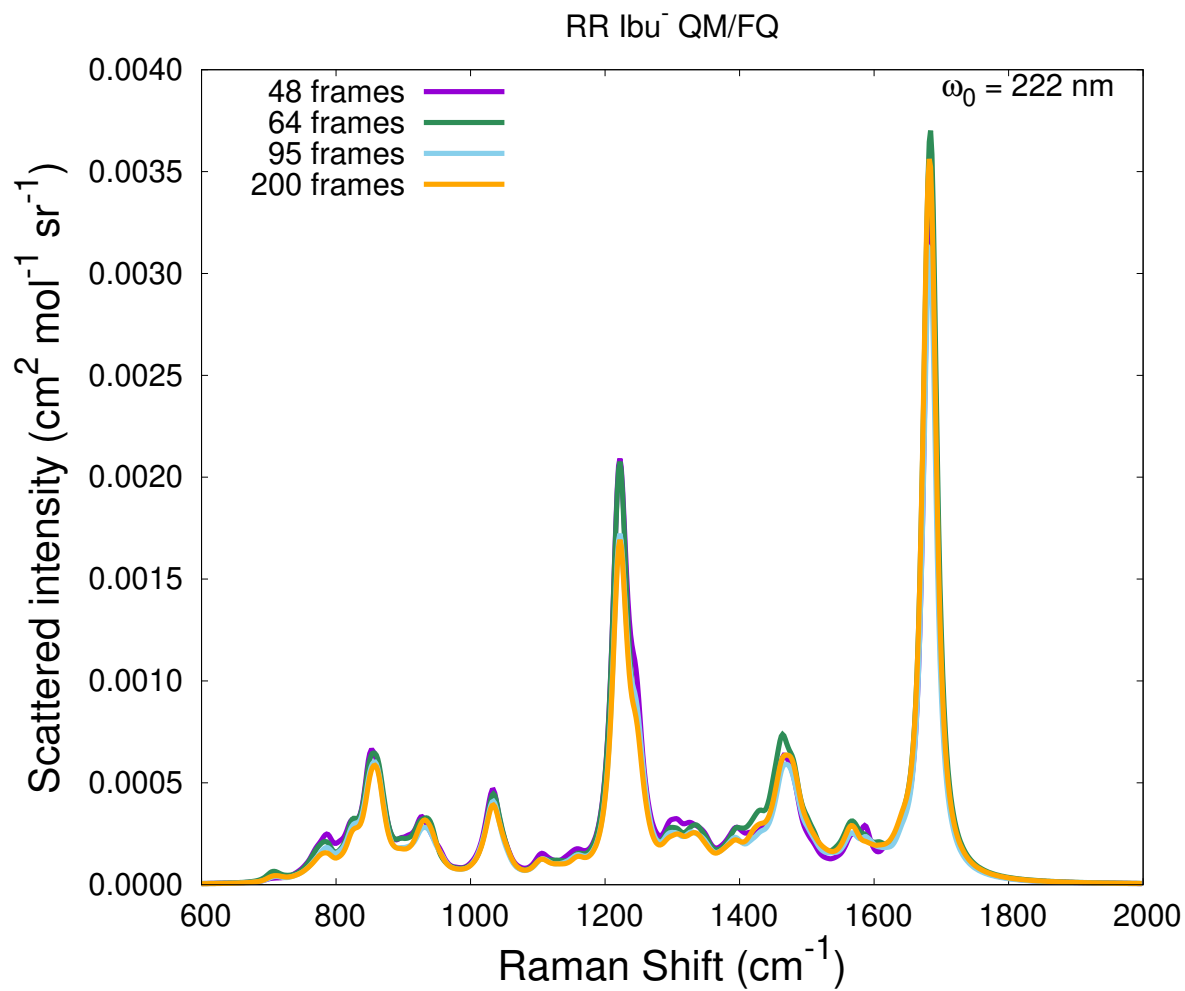

Figure S8: Comparison between the QM/FQ Resonance Raman spectra of anionic Ibuprofen in aqueous solution obtained by averaging an increasing number of snapshots.
